# Supplementary material
Source: PubMed Central journal article supplement (PMC8990359)
Supplement: jamaoncol-e220467-s001.pdf [file jamaoncol-e220467-s001.pdf]

## Supplemental Online Content

Klaassen Z, Stock S, Waller J, De Hoedt A, Freedland SJ. Association of the COVID-19 pandemic with rates of prostate cancer biopsies and diagnoses in Black vs White US veterans. *JAMA Oncol*. Published online April 7, 2022.  
doi:10.1001/jamaoncol.2022.0467

**eTable 1.** The observed and expected number of prostate biopsies and new prostate cancer diagnoses had there not been a pandemic interruption, stratified by race

**eTable 2.** Incidence rate ratios from the Poisson generalized linear models

This supplemental material has been provided by the authors to give readers additional information about their work.

**eTable 1.** The observed and expected number of prostate biopsies and new prostate cancer diagnoses had there not been a pandemic interruption, stratified by race

|                | Number of Prostate Biopsies |                     |          |                     | Number of New PC Diagnoses |                     |          |                     |
|----------------|-----------------------------|---------------------|----------|---------------------|----------------------------|---------------------|----------|---------------------|
|                | White                       |                     | Black    |                     | White                      |                     | Black    |                     |
|                | Observed                    | Expected * (95% CI) | Observed | Expected * (95% CI) | Observed                   | Expected * (95% CI) | Observed | Expected * (95% CI) |
| March 2020     | 620                         | 829 (780, 882)      | 339      | 451 (414, 490)      | 362                        | 471 (439, 506)      | 208      | 280 (255, 307)      |
| April 2020     | 206                         | 820 (769, 875)      | 111      | 448 (410, 490)      | 125                        | 466 (432, 502)      | 75       | 278 (252, 306)      |
| May 2020       | 317                         | 811 (758, 869)      | 140      | 445 (405, 490)      | 200                        | 461 (426, 499)      | 97       | 276 (249, 306)      |
| June 2020      | 569                         | 803 (747, 863)      | 304      | 443 (401, 490)      | 329                        | 457 (420, 496)      | 176      | 275 (246, 306)      |
| July 2020      | 594                         | 794 (737, 857)      | 316      | 441 (397, 490)      | 319                        | 452 (414, 493)      | 178      | 273 (243, 306)      |
| August 2020    | 608                         | 785 (726, 850)      | 314      | 438 (393, 489)      | 337                        | 447 (408, 490)      | 180      | 271 (240, 306)      |
| September 2020 | 670                         | 776 (715, 843)      | 371      | 436 (389, 489)      | 372                        | 442 (402, 486)      | 224      | 269 (238, 305)      |
| October 2020   | 698                         | 767 (704, 836)      | 385      | 433 (384, 488)      | 375                        | 437 (396, 483)      | 243      | 268 (235, 305)      |
| November 2020  | 639                         | 758 (693, 829)      | 371      | 430 (380, 488)      | 366                        | 432 (390, 479)      | 225      | 266 (232, 305)      |
| December 2020  | 611                         | 748 (682, 822)      | 339      | 428 (375, 487)      | 318                        | 427 (383, 476)      | 181      | 264 (229, 304)      |
| January 2021   | 632                         | 741 (672, 817)      | 348      | 425 (372, 487)      | 351                        | 423 (378, 473)      | 206      | 262 (226, 304)      |
| February 2021  | 628                         | 733 (662, 811)      | 342      | 423 (368, 487)      | 318                        | 419 (373, 471)      | 186      | 261 (224, 304)      |
| March 2021     | 799                         | 725 (653, 805)      | 470      | 422 (365, 488)      | 223                        | 415 (367, 468)      | 148      | 260 (222, 305)      |

\*Expected counts were estimated using interrupted time-series analyses based on Poisson generalized linear models.

PC = prostate cancer, CI = confidence interval

**eTable 2.** Incidence rate ratios from the Poisson generalized linear models

|                           | Number of Prostate Biopsies |              |         | Number of New PC Diagnoses |              |         |
|---------------------------|-----------------------------|--------------|---------|----------------------------|--------------|---------|
|                           | IRR                         | 95% CI       | P-value | IRR                        | 95% CI       | P-value |
| Time (month)              | 0.99                        | (0.99, 0.99) | <0.001  | 0.99                       | (0.99, 0.99) | <0.001  |
| Race (Black vs. White)    | 2.25                        | (2.06, 2.46) | <0.001  | 2.54                       | (2.30, 2.81) | <0.001  |
| Time*Race                 | 1.01                        | (1.00, 1.01) | 0.09    | 1.00                       | (1.00, 1.01) | 0.24    |
| Pandemic onset            | 0.28                        | (0.15, 0.50) | <0.001  | 1.02                       | (0.36, 2.86) | 0.97    |
| Race*Pandemic onset       | 0.87                        | (0.33, 2.27) | 0.77    | 0.72                       | (0.17, 3.08) | 0.66    |
| March 2020 Indicator      | 1.13                        | (1.01, 1.26) | 0.03    | 0.95                       | (0.77, 1.16) | 0.62    |
| April 2020 Indicator      | 0.37                        | (0.33, 0.40) | <0.001  | 0.33                       | (0.28, 0.40) | <0.001  |
| May 2020 Indicator        | 0.55                        | (0.51, 0.60) | <0.001  | 0.54                       | (0.47, 0.63) | <0.001  |
| Time*Pandemic onset       | 1.03                        | (1.01, 1.05) | <0.001  | 0.99                       | (0.96, 1.02) | 0.59    |
| Race*March 2020 Indicator | 1.06                        | (0.89, 1.27) | 0.52    | 1.07                       | (0.79, 1.46) | 0.66    |
| Race*April 2020 Indicator | 1.04                        | (0.89, 1.20) | 0.65    | 1.11                       | (0.85, 1.44) | 0.46    |
| Race*May 2020 Indicator   | 0.84                        | (0.74, 0.95) | 0.007   | 0.88                       | (0.70, 1.11) | 0.28    |
| Time*Race*Pandemic onset  | 1.00                        | (0.97, 1.03) | 0.83    | 1.01                       | (0.97, 1.05) | 0.71    |
| Joint test <sup>†</sup>   |                             |              | 0.96    |                            |              | 0.97    |

<sup>†</sup>Joint test evaluated changes in race effects during the pandemic onset and recovery periods (March 2020-March 2021).

PC = prostate cancer, IRR = incidence rate ratio, CI = confidence interval
